# Supplementary material
Source: publisher site journal article supplement (https://www.dovepress.com/get_supplementary_file.php?f=460856.docx)
Supplement: Supplementary file 1 [file get_supplementary_file.php]

Appendix 1. Modified Breast-GPA Index for Women With Breast Cancer and Brain Metastases.

| Factor/Scores | 0 | 0.5 | 1.0 | 1.5 | 2.0 |
| --- | --- | --- | --- | --- | --- |
| KPS | ≤50 | 60 | 70-80 | 90-100 | - |
| Molecular  Subtype | Triple-negative | Hormone receptor-positive / HER2-negative | HER2 overexpression | Hormone receptor-positive / HER2-positive | - |
| Age (years) | >50 | ≤50 |  |  |  |
| Number of Brain Metastases | >3 | 1-3 |  |  |  |

KPS, Karnofsky performance status.
